# Supplementary material
Source: PubMed Central journal article supplement (PMC3554159)

**Supplemental Figure 1 Title: Phylogenetic trees of *env* and *pol* from each participant.**

Supplemental Figure 1 Legend: Individual phylogenetic trees for *env* and *pol* HIV-1 DNA sequences from participants B2, F1, L1, R1, and V1 are illustrated in panels A – J. The tips of the phylogenetic trees are coded to represent the cell type and time-point from which the sequence is derived. Circles represent PBMC-derived sequences and squares represent sputa-derived sequences. The earliest time-points are black, the most recent time-points are magenta, and the intervening time-points are color-coded according to the respective legends in Figure 1. The scale is given below each phylogenetic tree. Figure 1G was modified to help visualize it on one page, the largest cluster of monotypic sequences was collapsed to a triangle and moved to the right. The actual location of this cluster within the tree is indicated by the arrow marked with an asterisk.

**Supplemental Figure 2 Title: Changes in the proportion of monotypic sequences over time among subsets of sequences.**

Supplement Figure 2 Legend: Proportion of monotypic *env* (panel A), *pol* (panel B), PBMC (panel C) and sputum (panel D) sequences over time. The Lowess curve of each individual participant is plotted, except when less than four time-points are available, in which case the individual data points are plotted.

SUPPLEMENTAL FIGURE 1A

Participant: B2

Gene: *env*

Region: C2 - V5

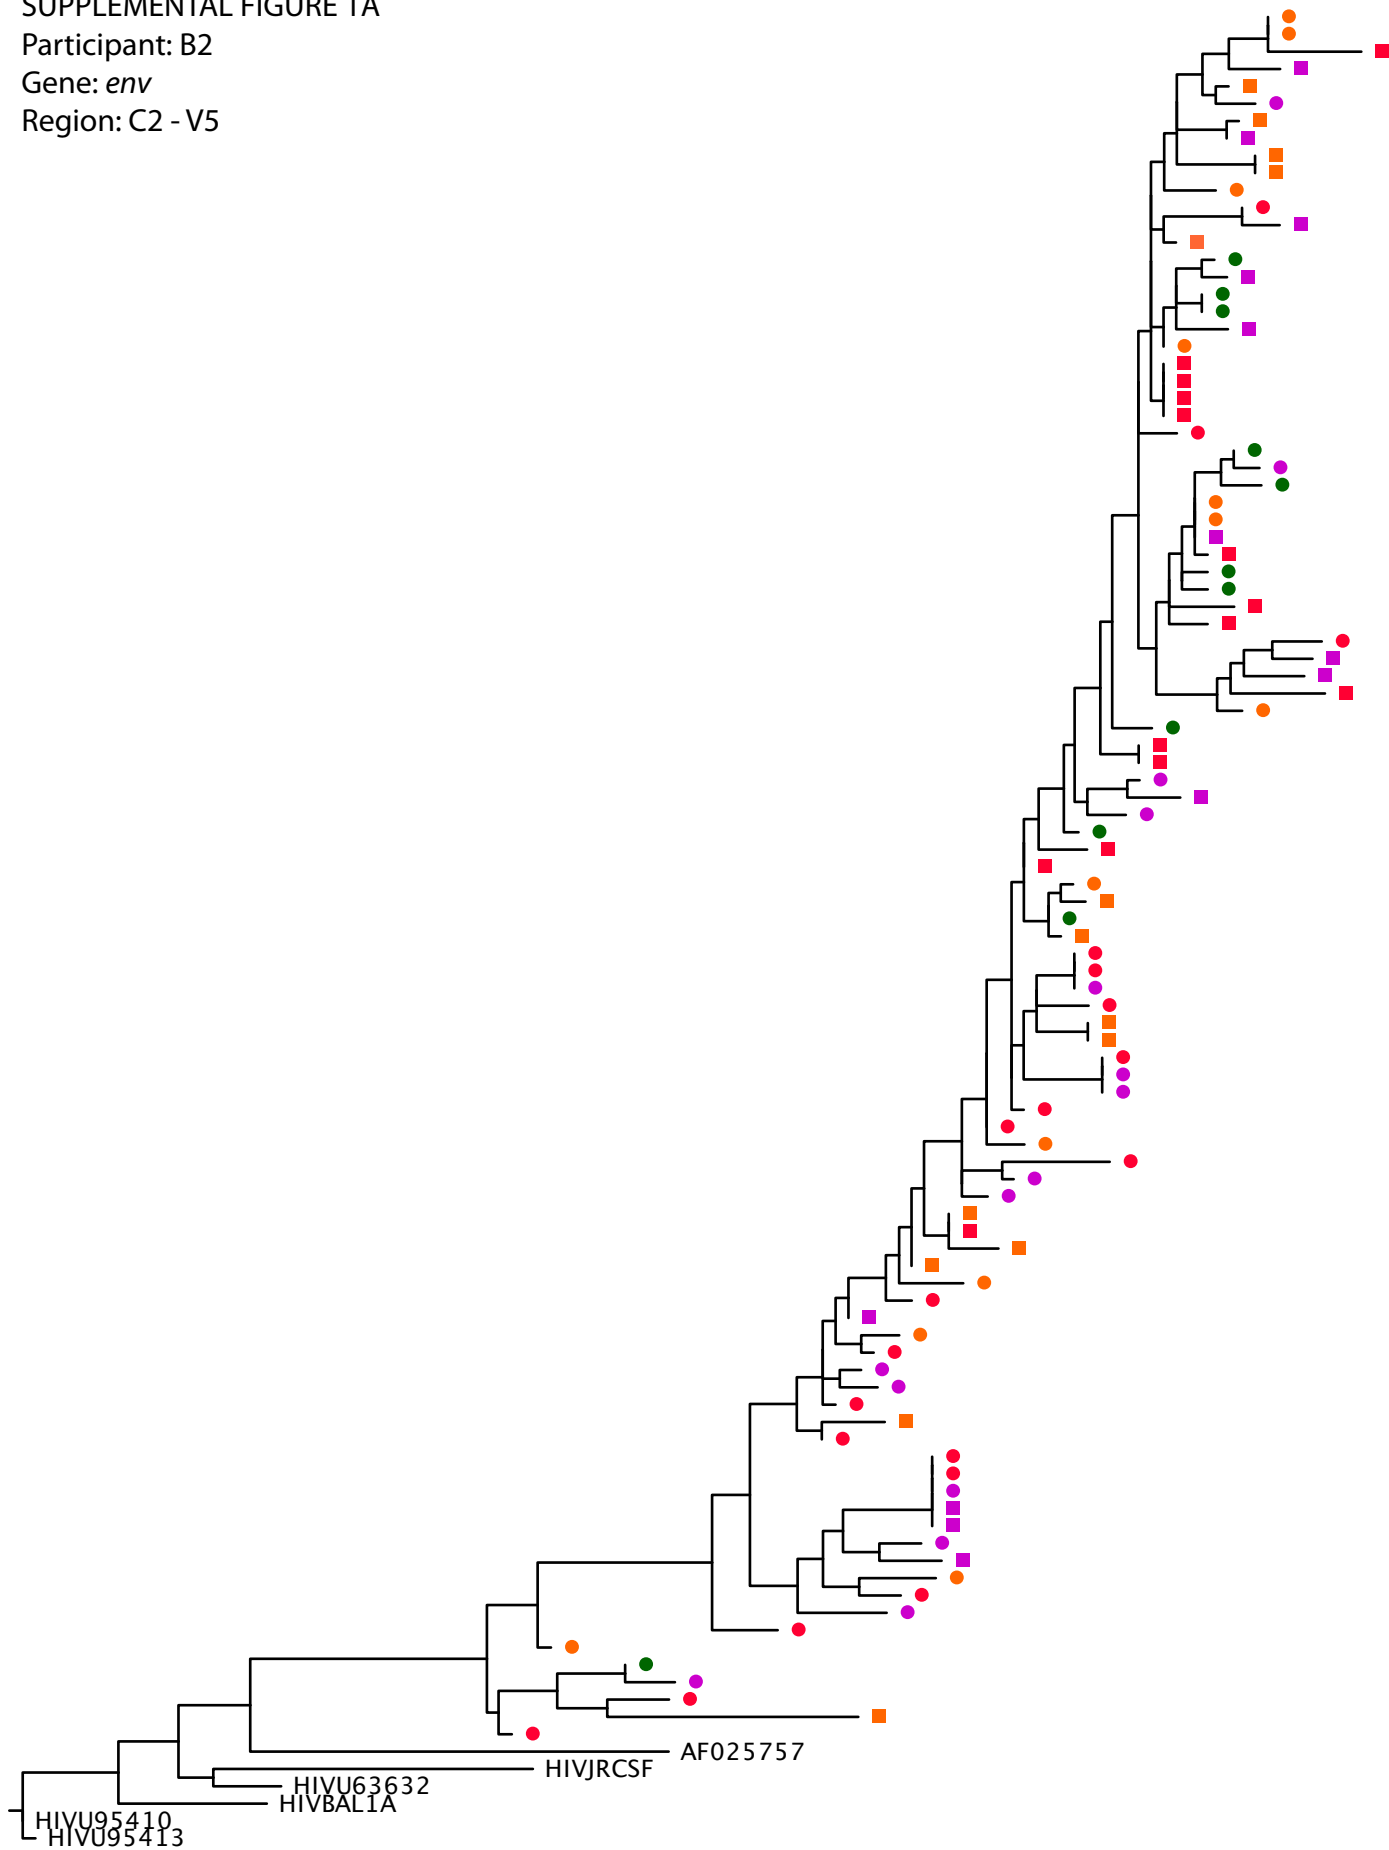

0.03

SUPPLEMENTAL FIGURE 1B

Participant: B2

Gene: *pol*

Region: RT

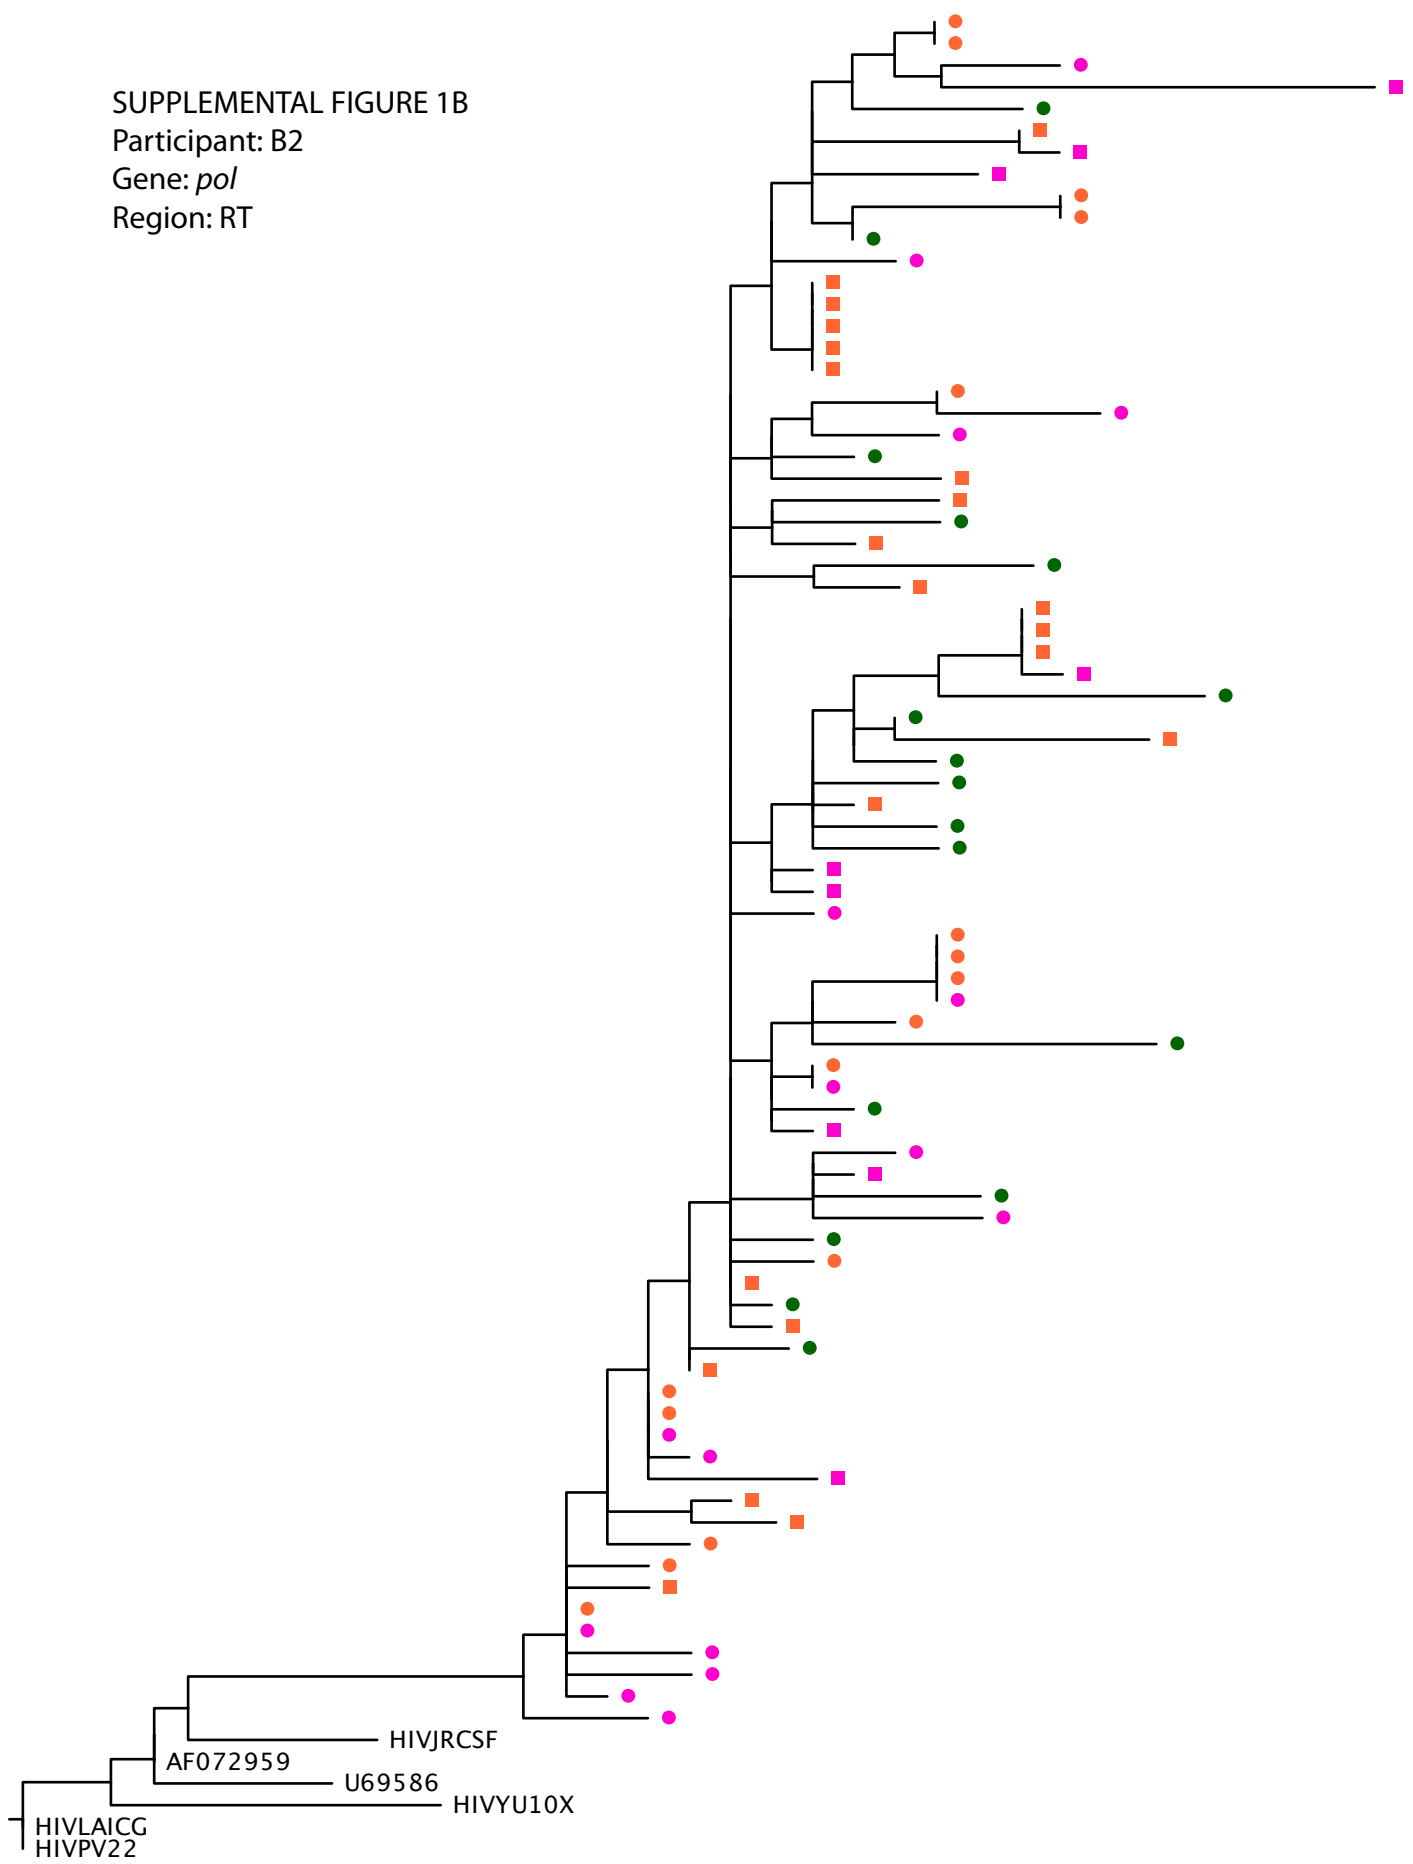

0.0060

SUPPLEMENTAL FIGURE 1C

Participant: F1

Gene: *env*

Region: C2 - V5

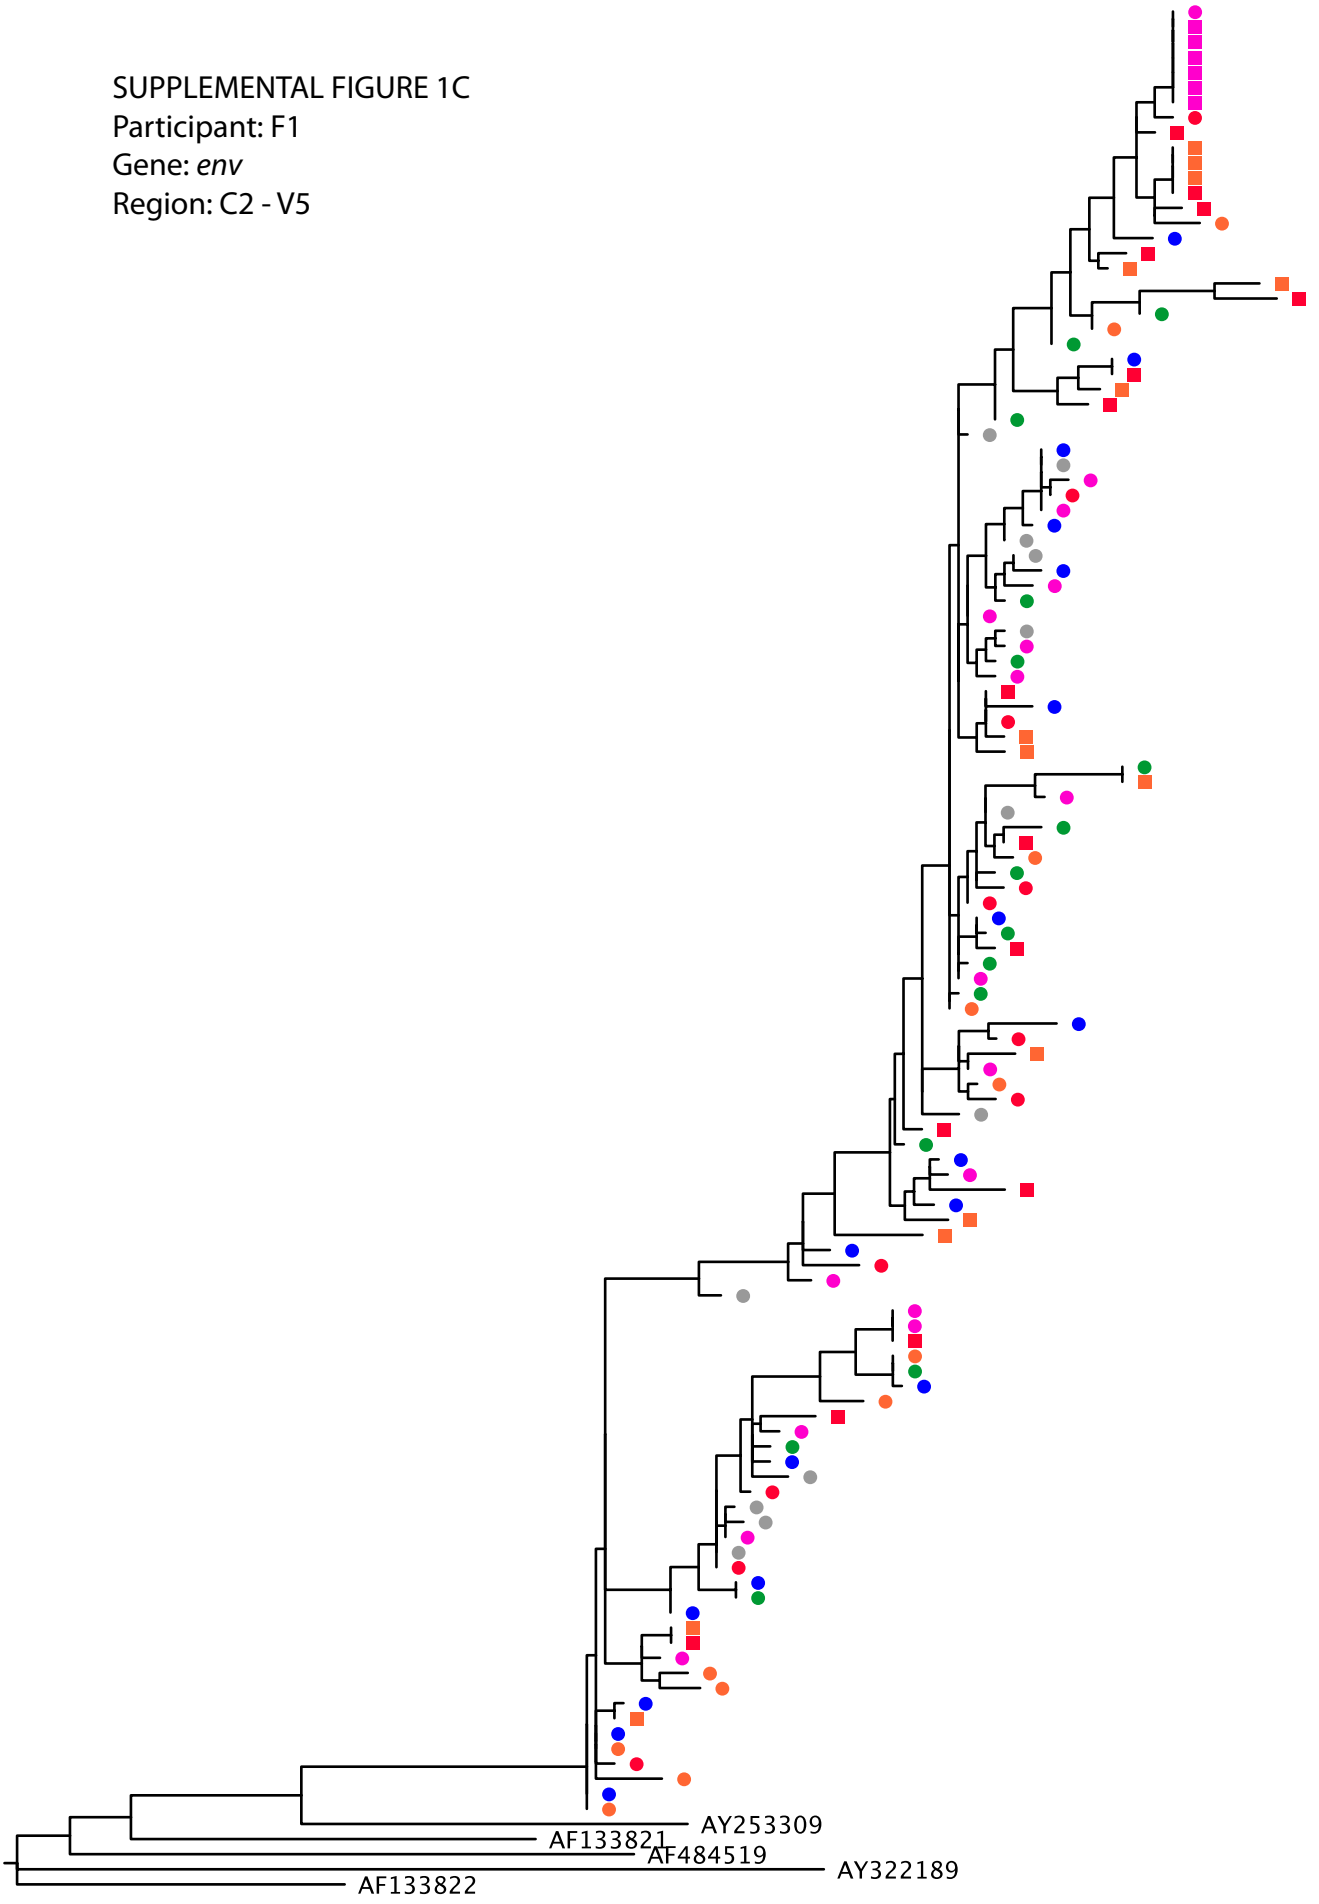

0.04

SUPPLEMENTAL FIGURE 1D  
Participant: F1  
Gene: *pol*  
Region: RT

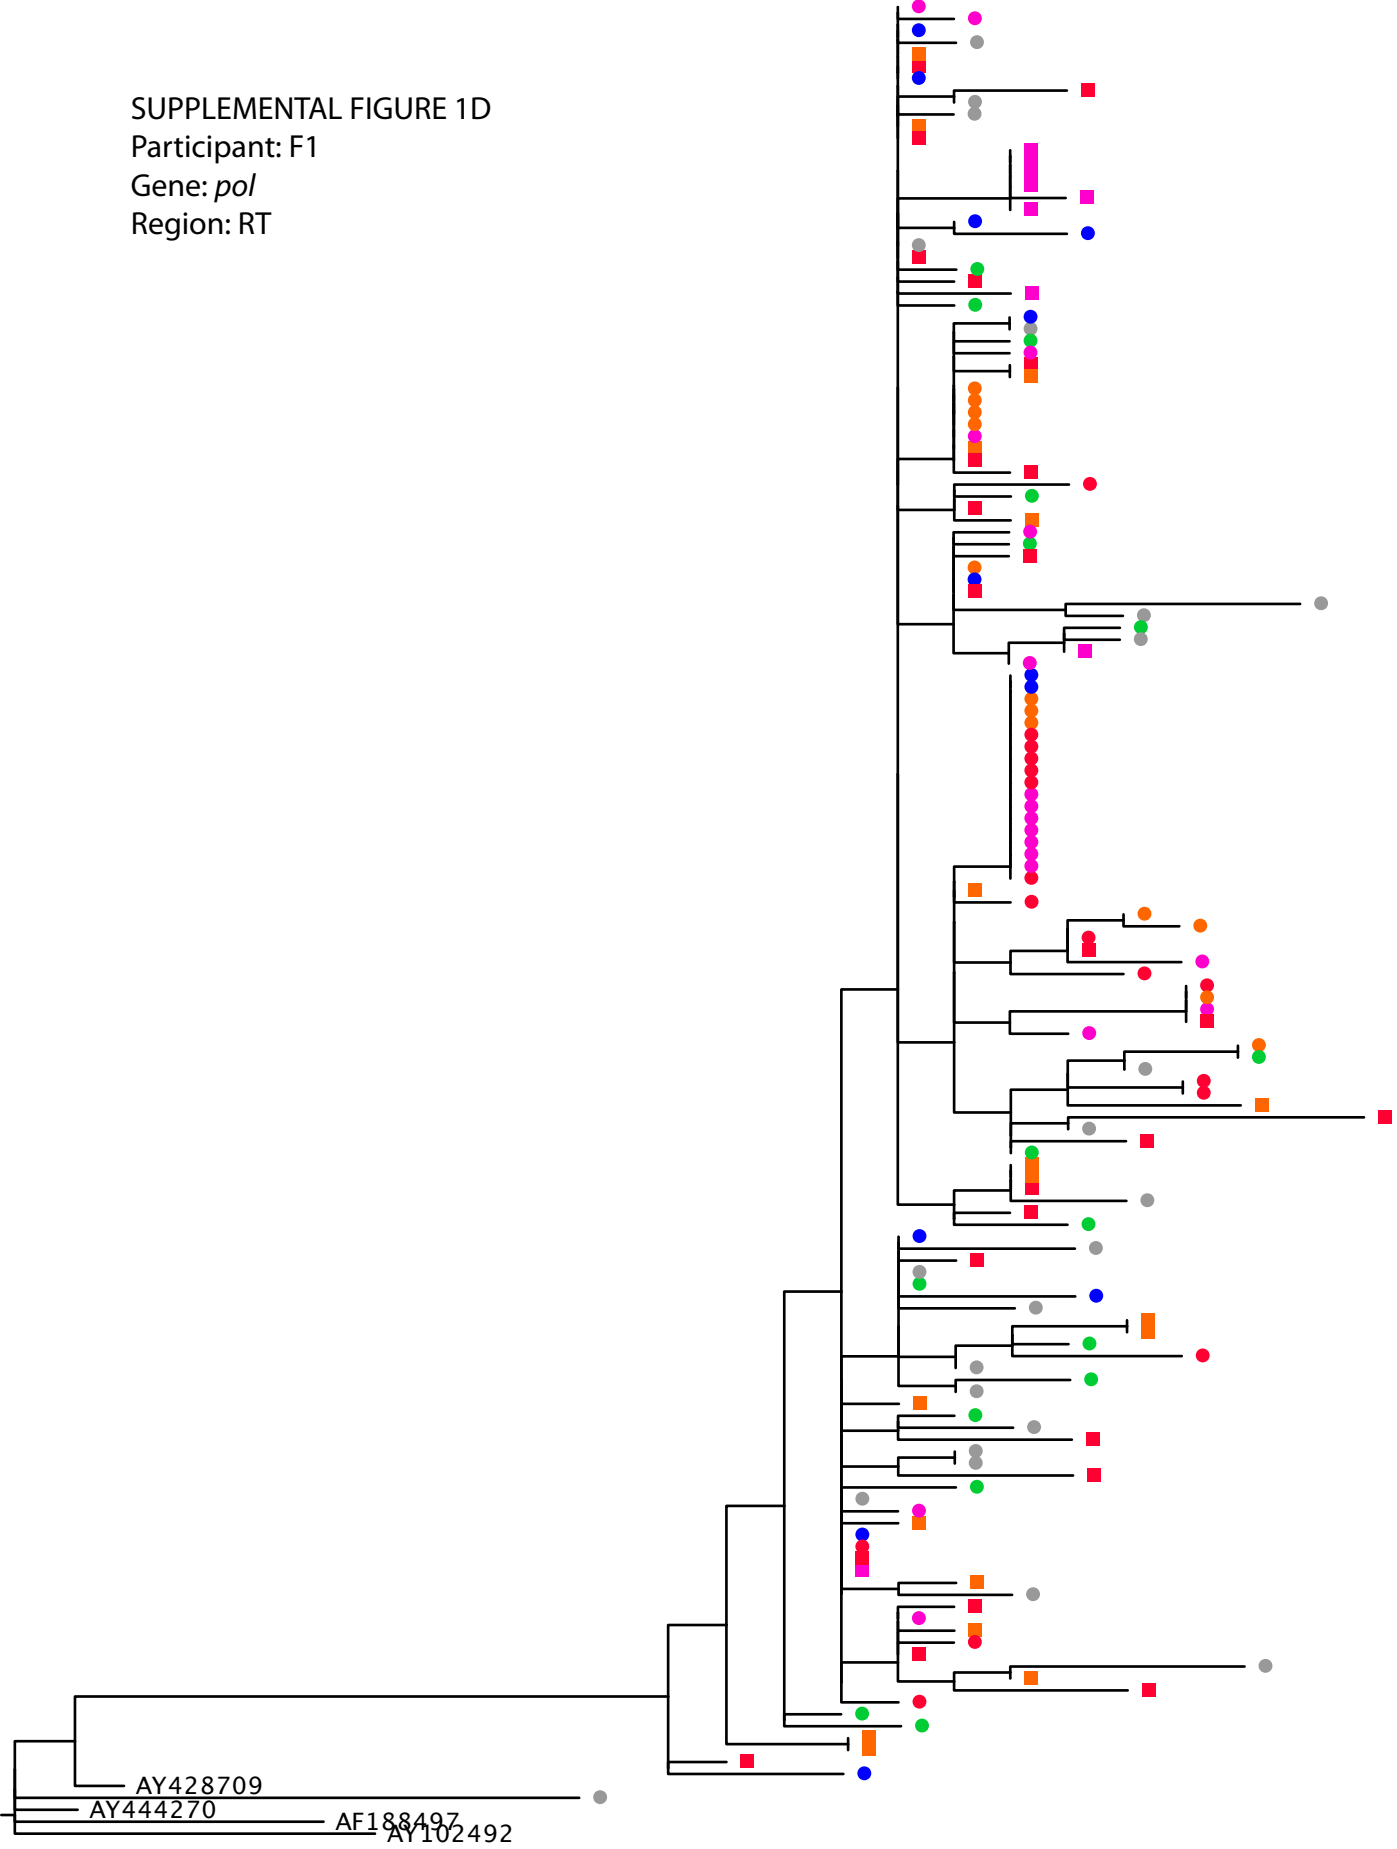

0.0050

SUPPLEMENTAL FIGURE 1E

Participant: L1

Gene: *env*

Region: C2 - V5

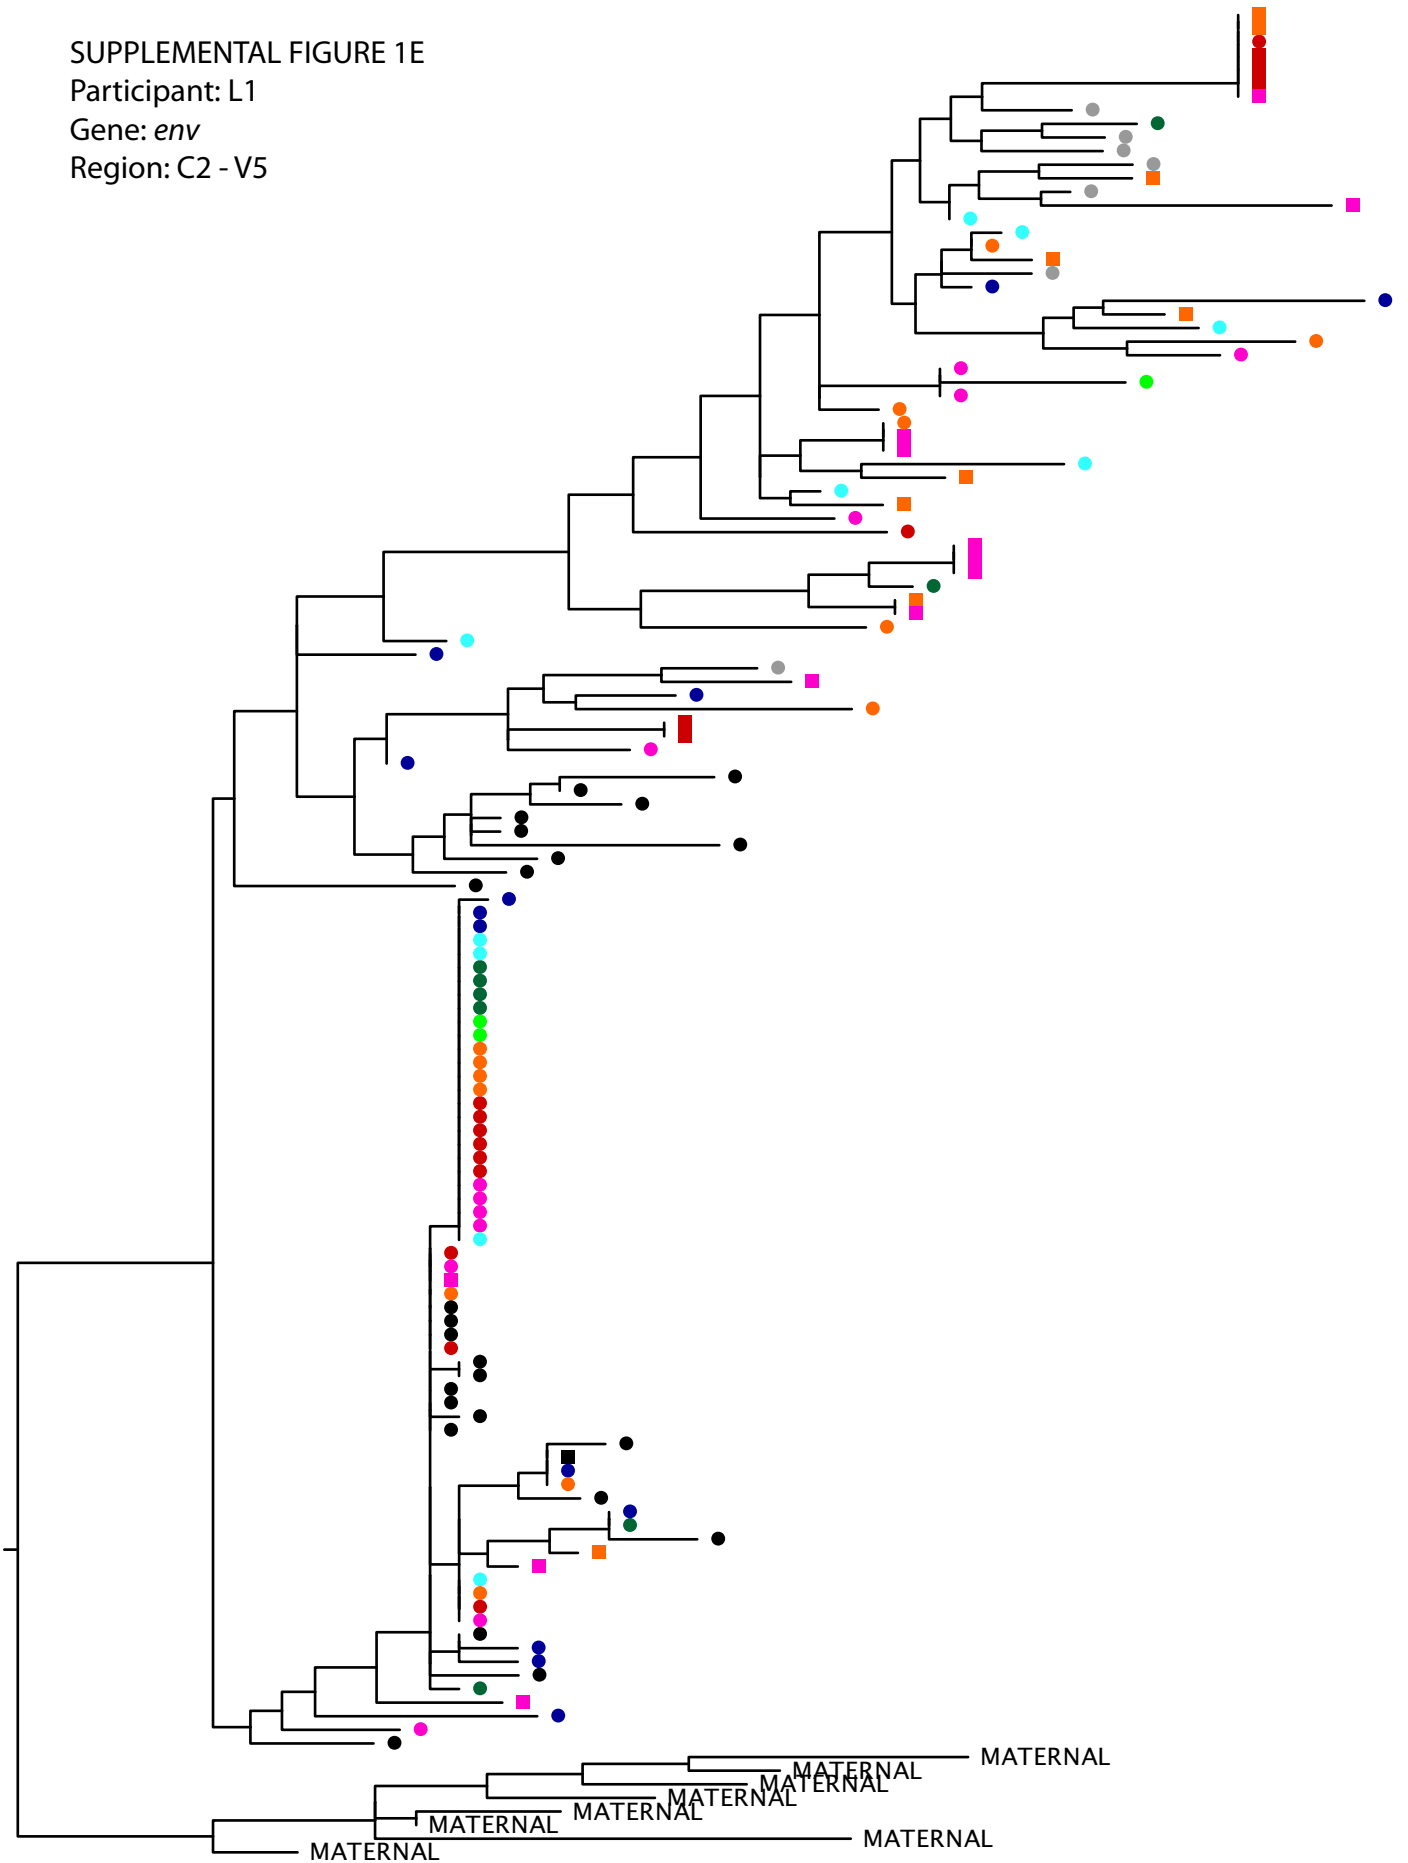

0.01

SUPPLEMENTAL FIGURE 1F

Participant: L1

Gene: *pol*

Region: RT

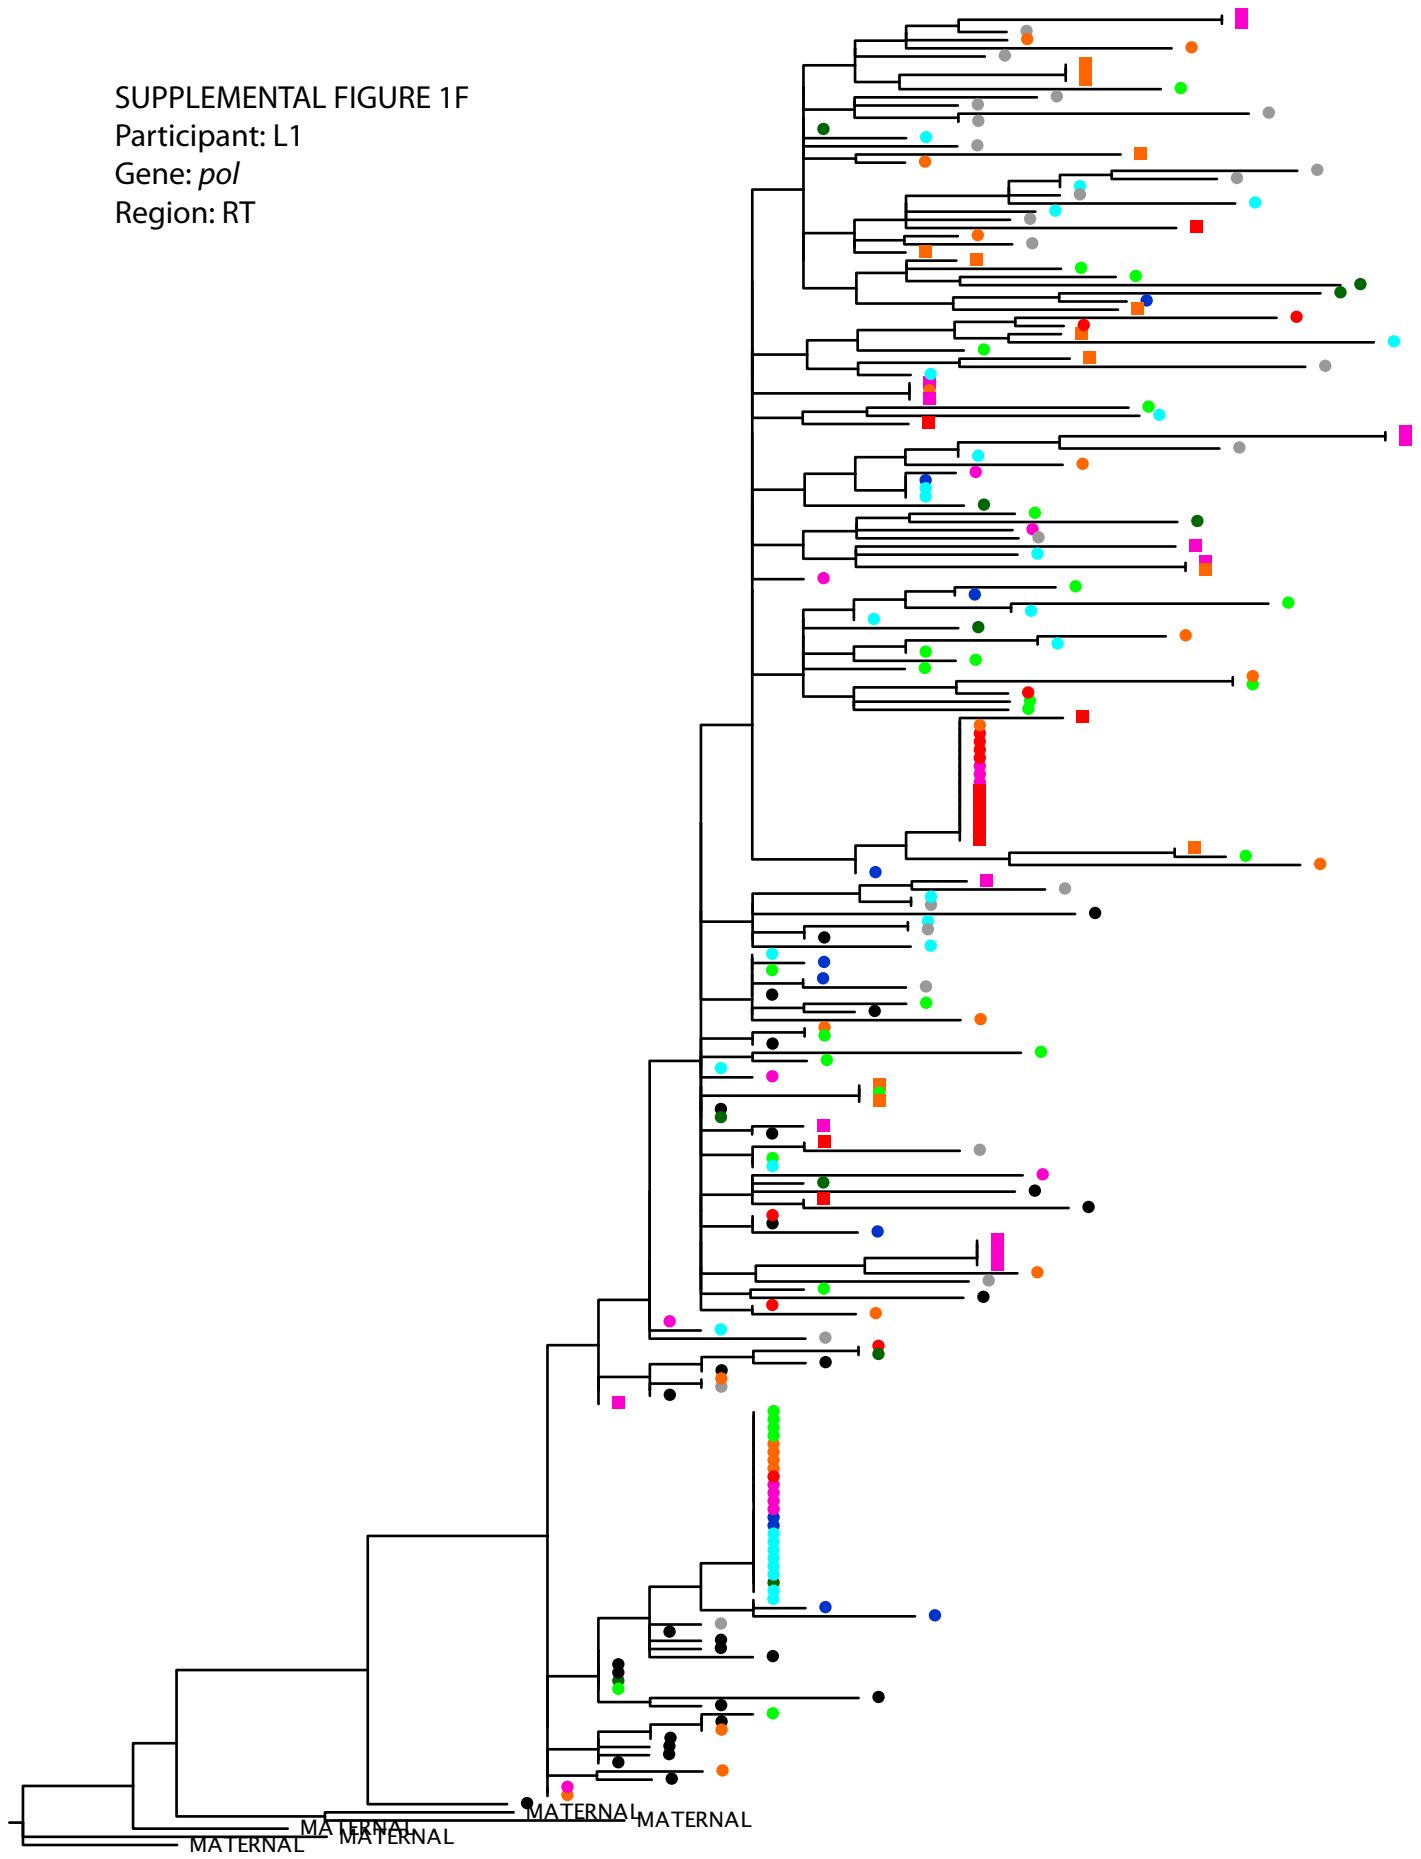

0.0060

SUPPLEMENTAL FIGURE 1G

Participant: R1

Gene: *env*

Region: C2 - V5

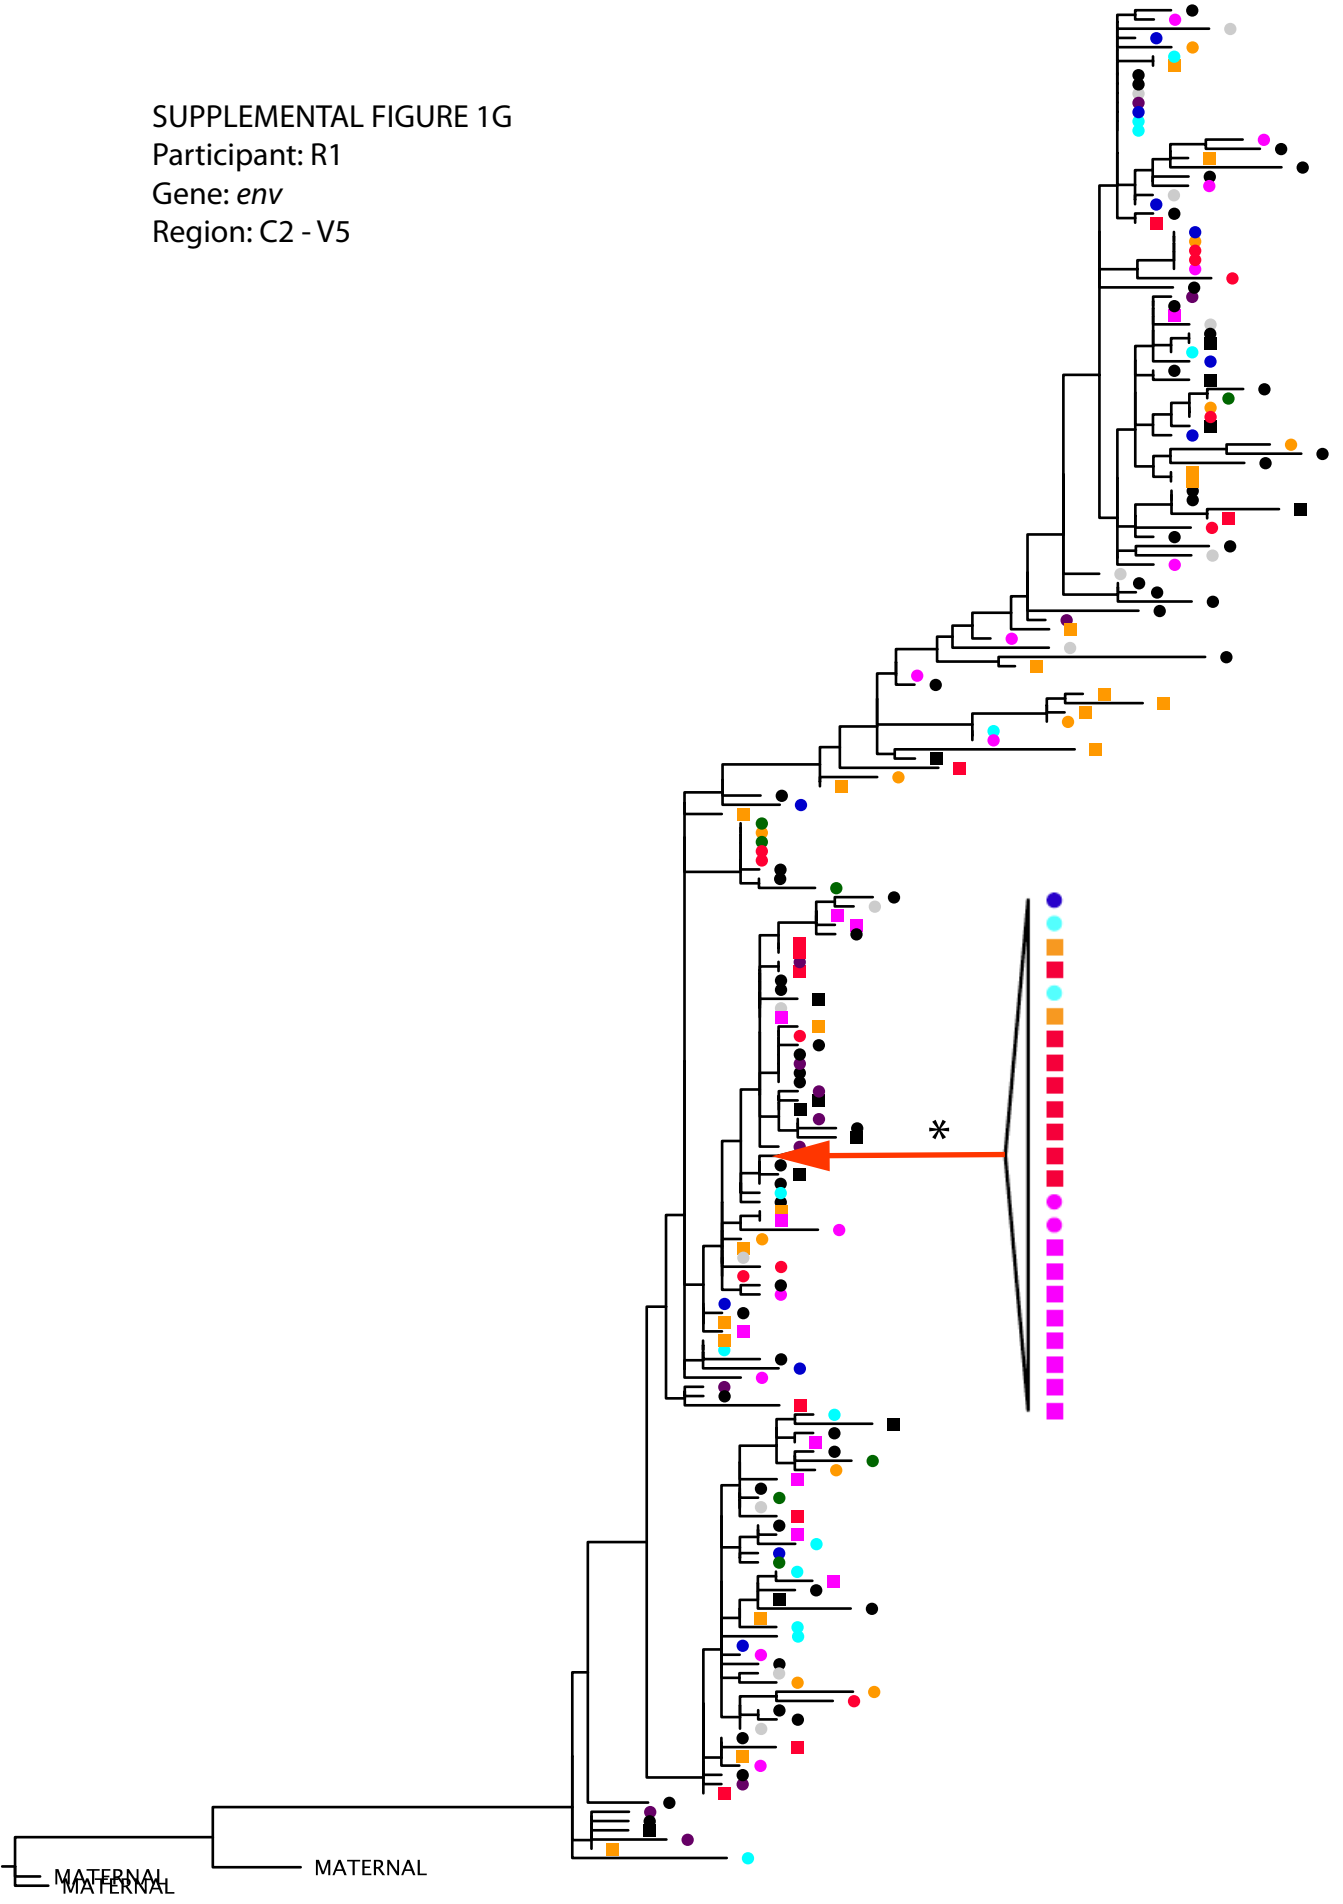

0.02



SUPPLEMENTAL FIGURE 1H

Participant: R1

Gene: *pol*

Region: RT

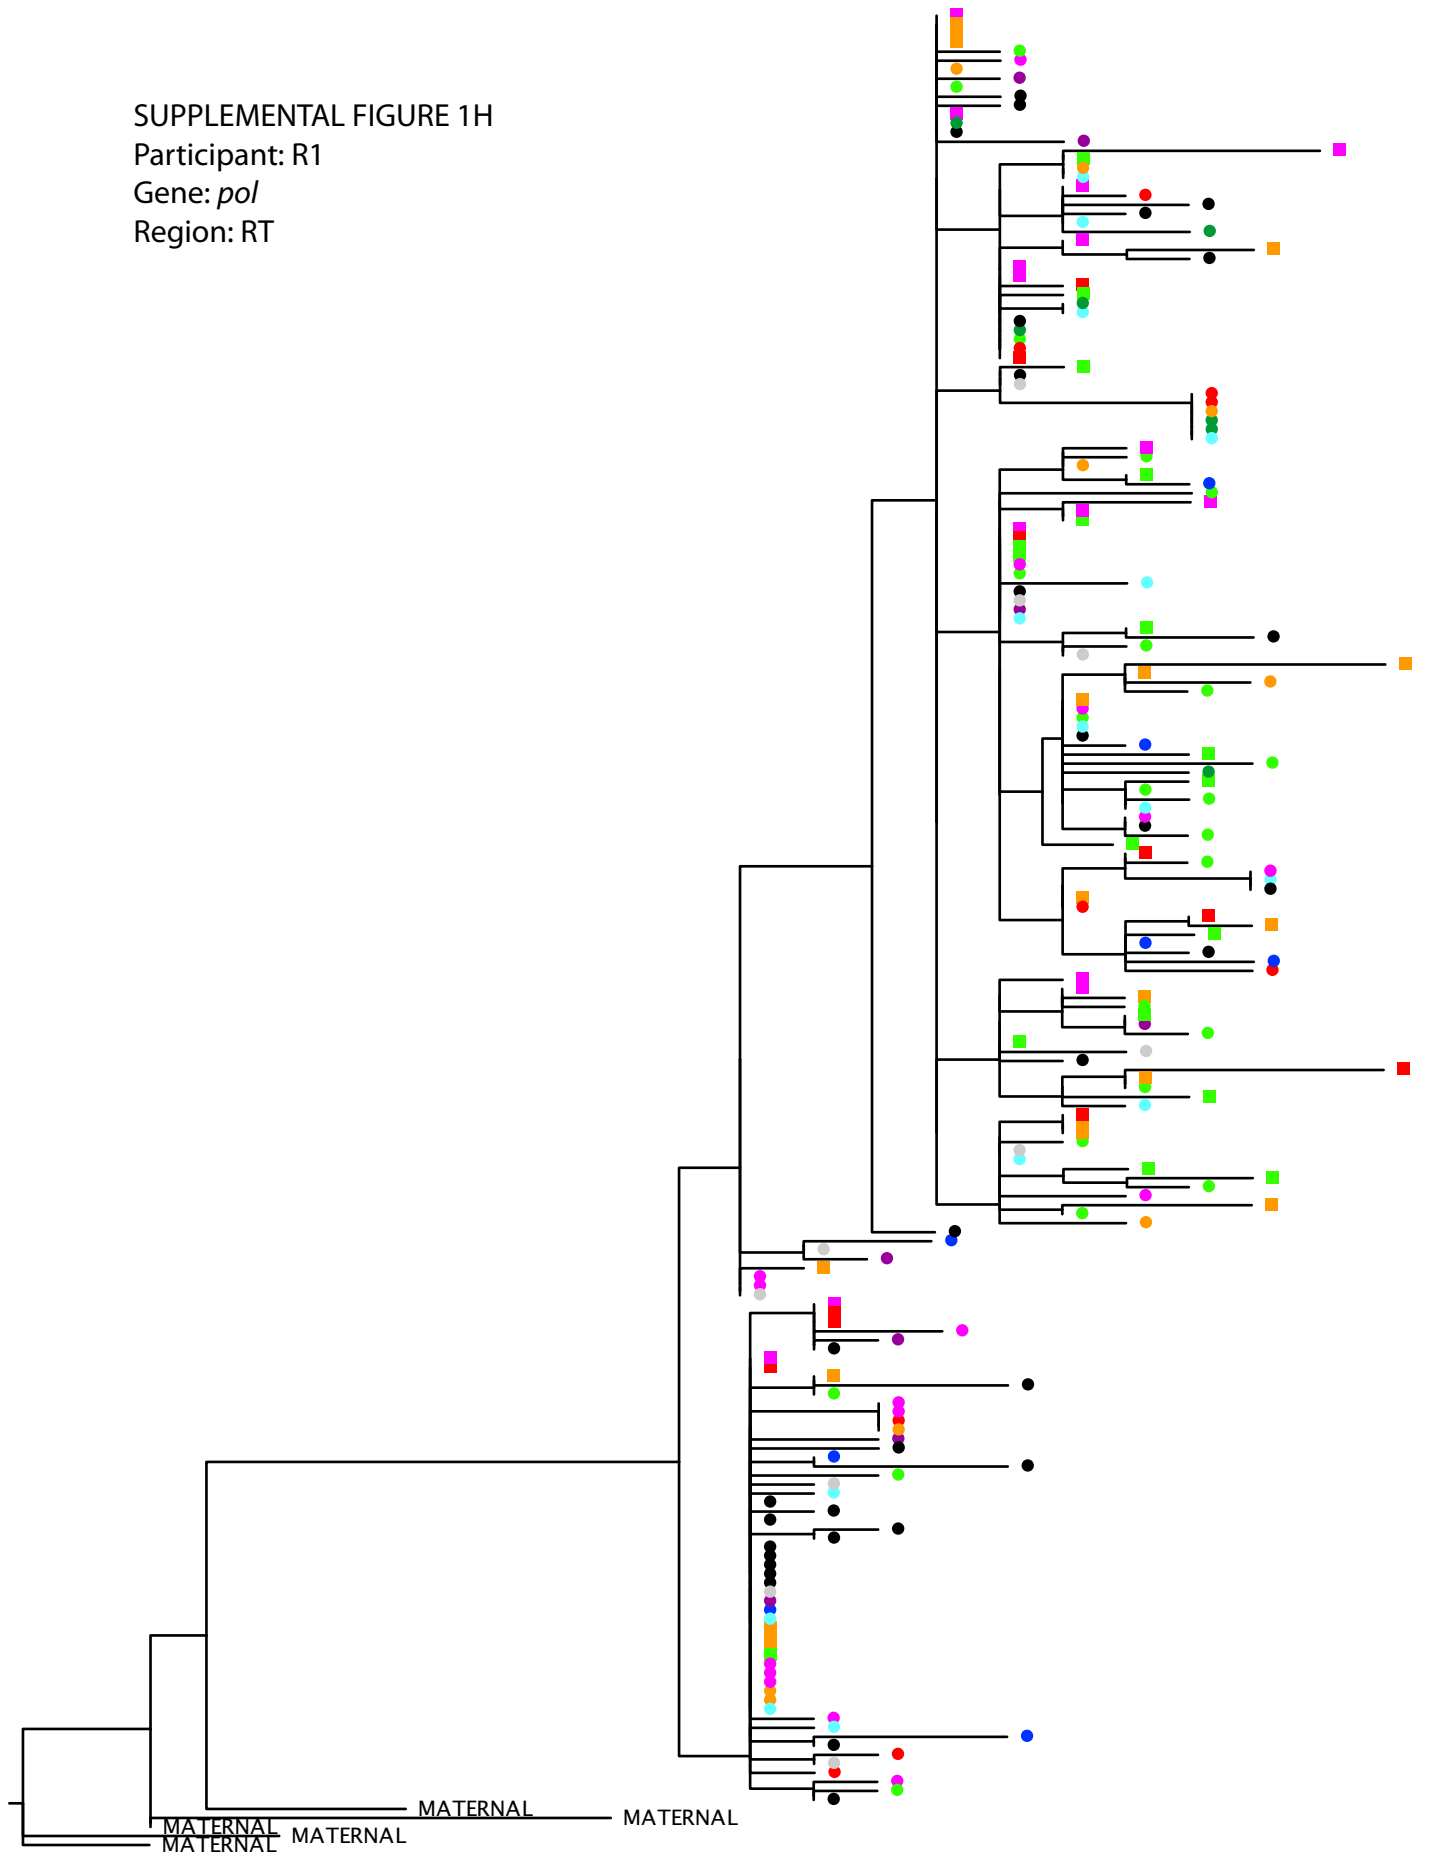

0.0050

SUPPLEMENTAL FIGURE 1 I

Participant: V1

Gene: *env*

Region: C2 - V5

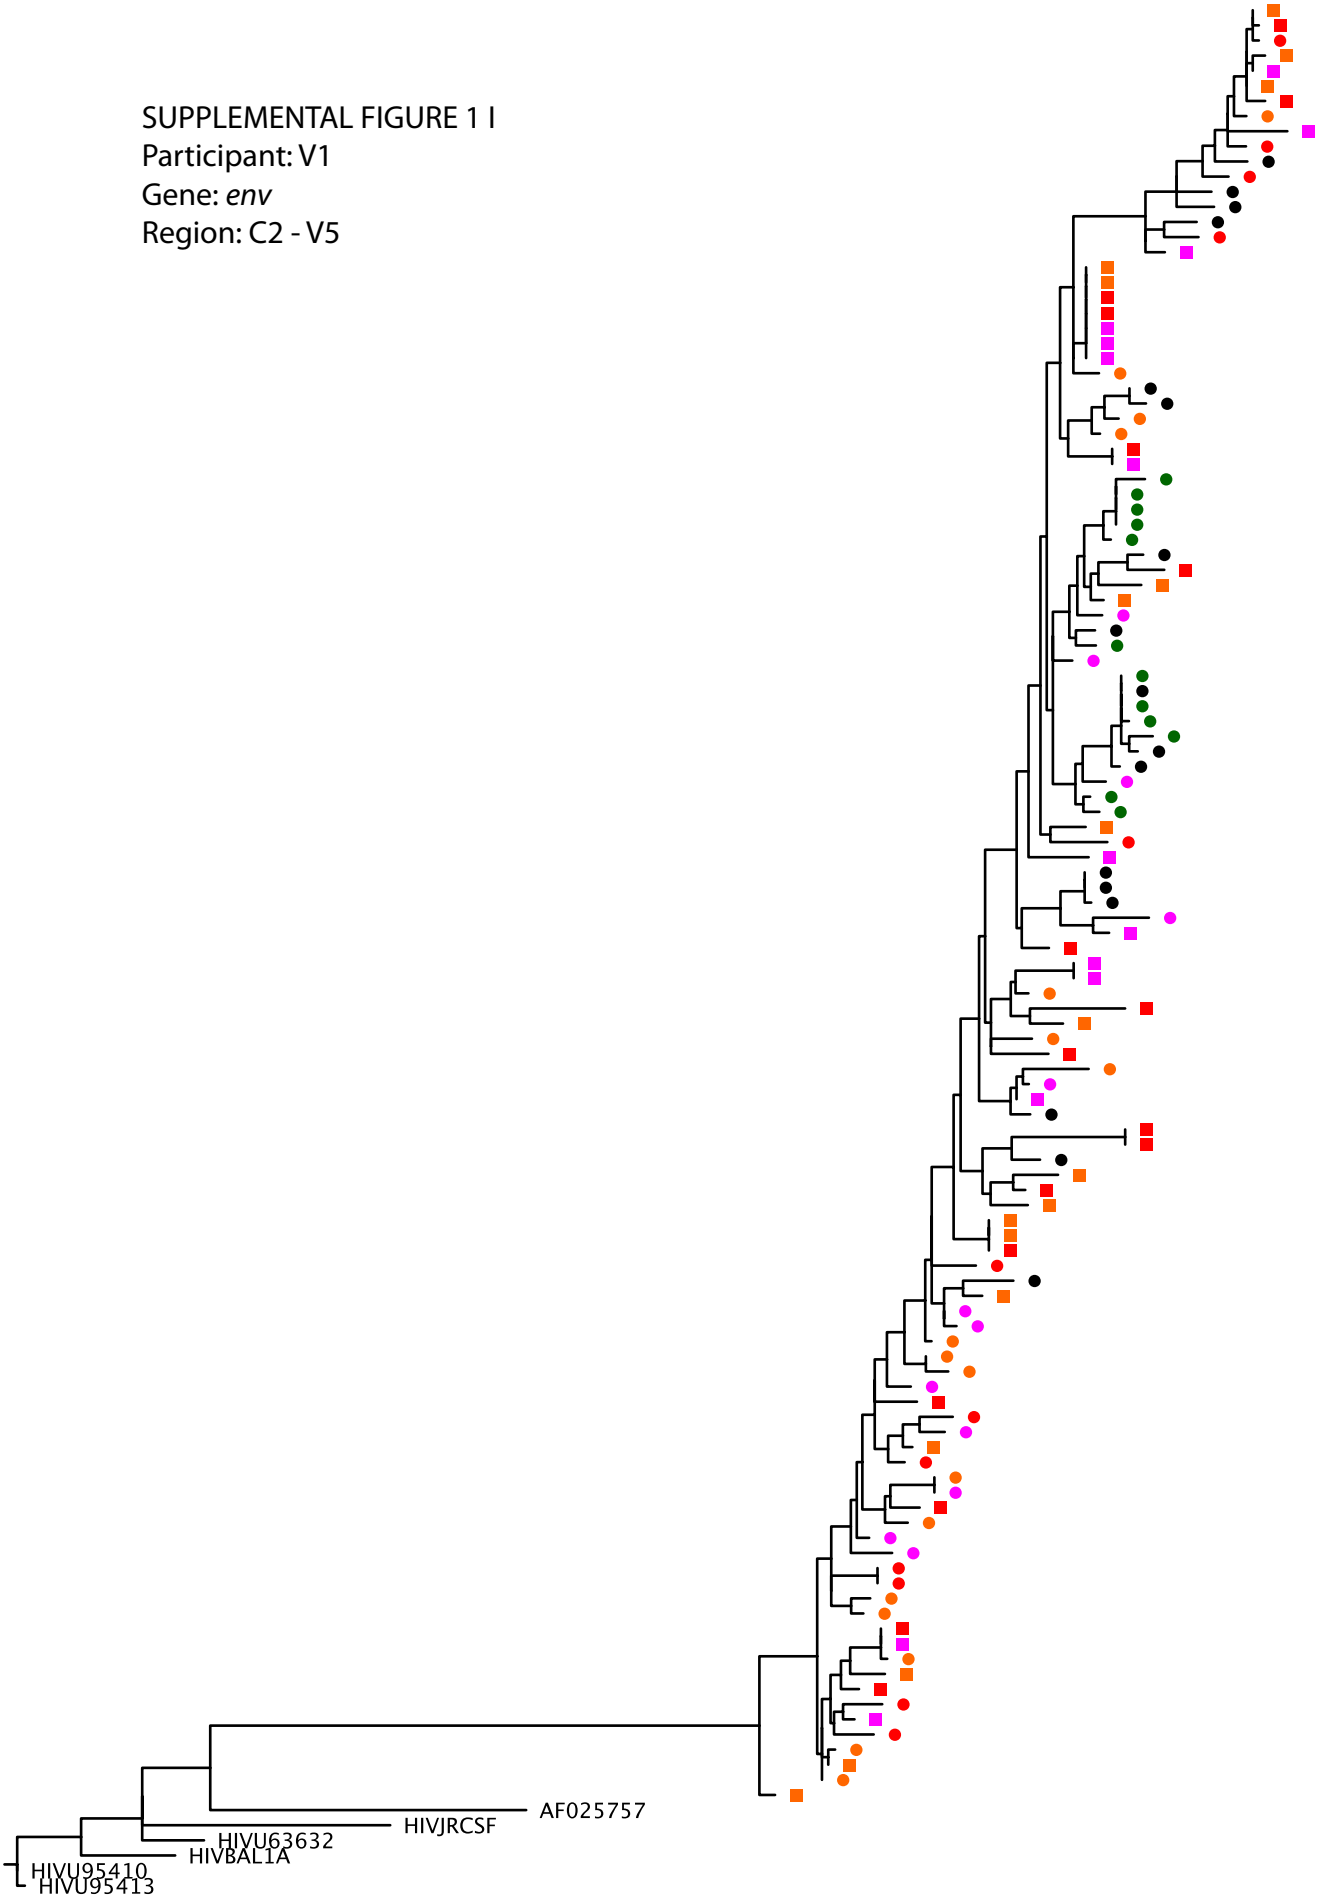

0.05

SUPPLEMENTAL FIGURE 1J  
Participant: V1  
Gene: *pol*  
Region: RT

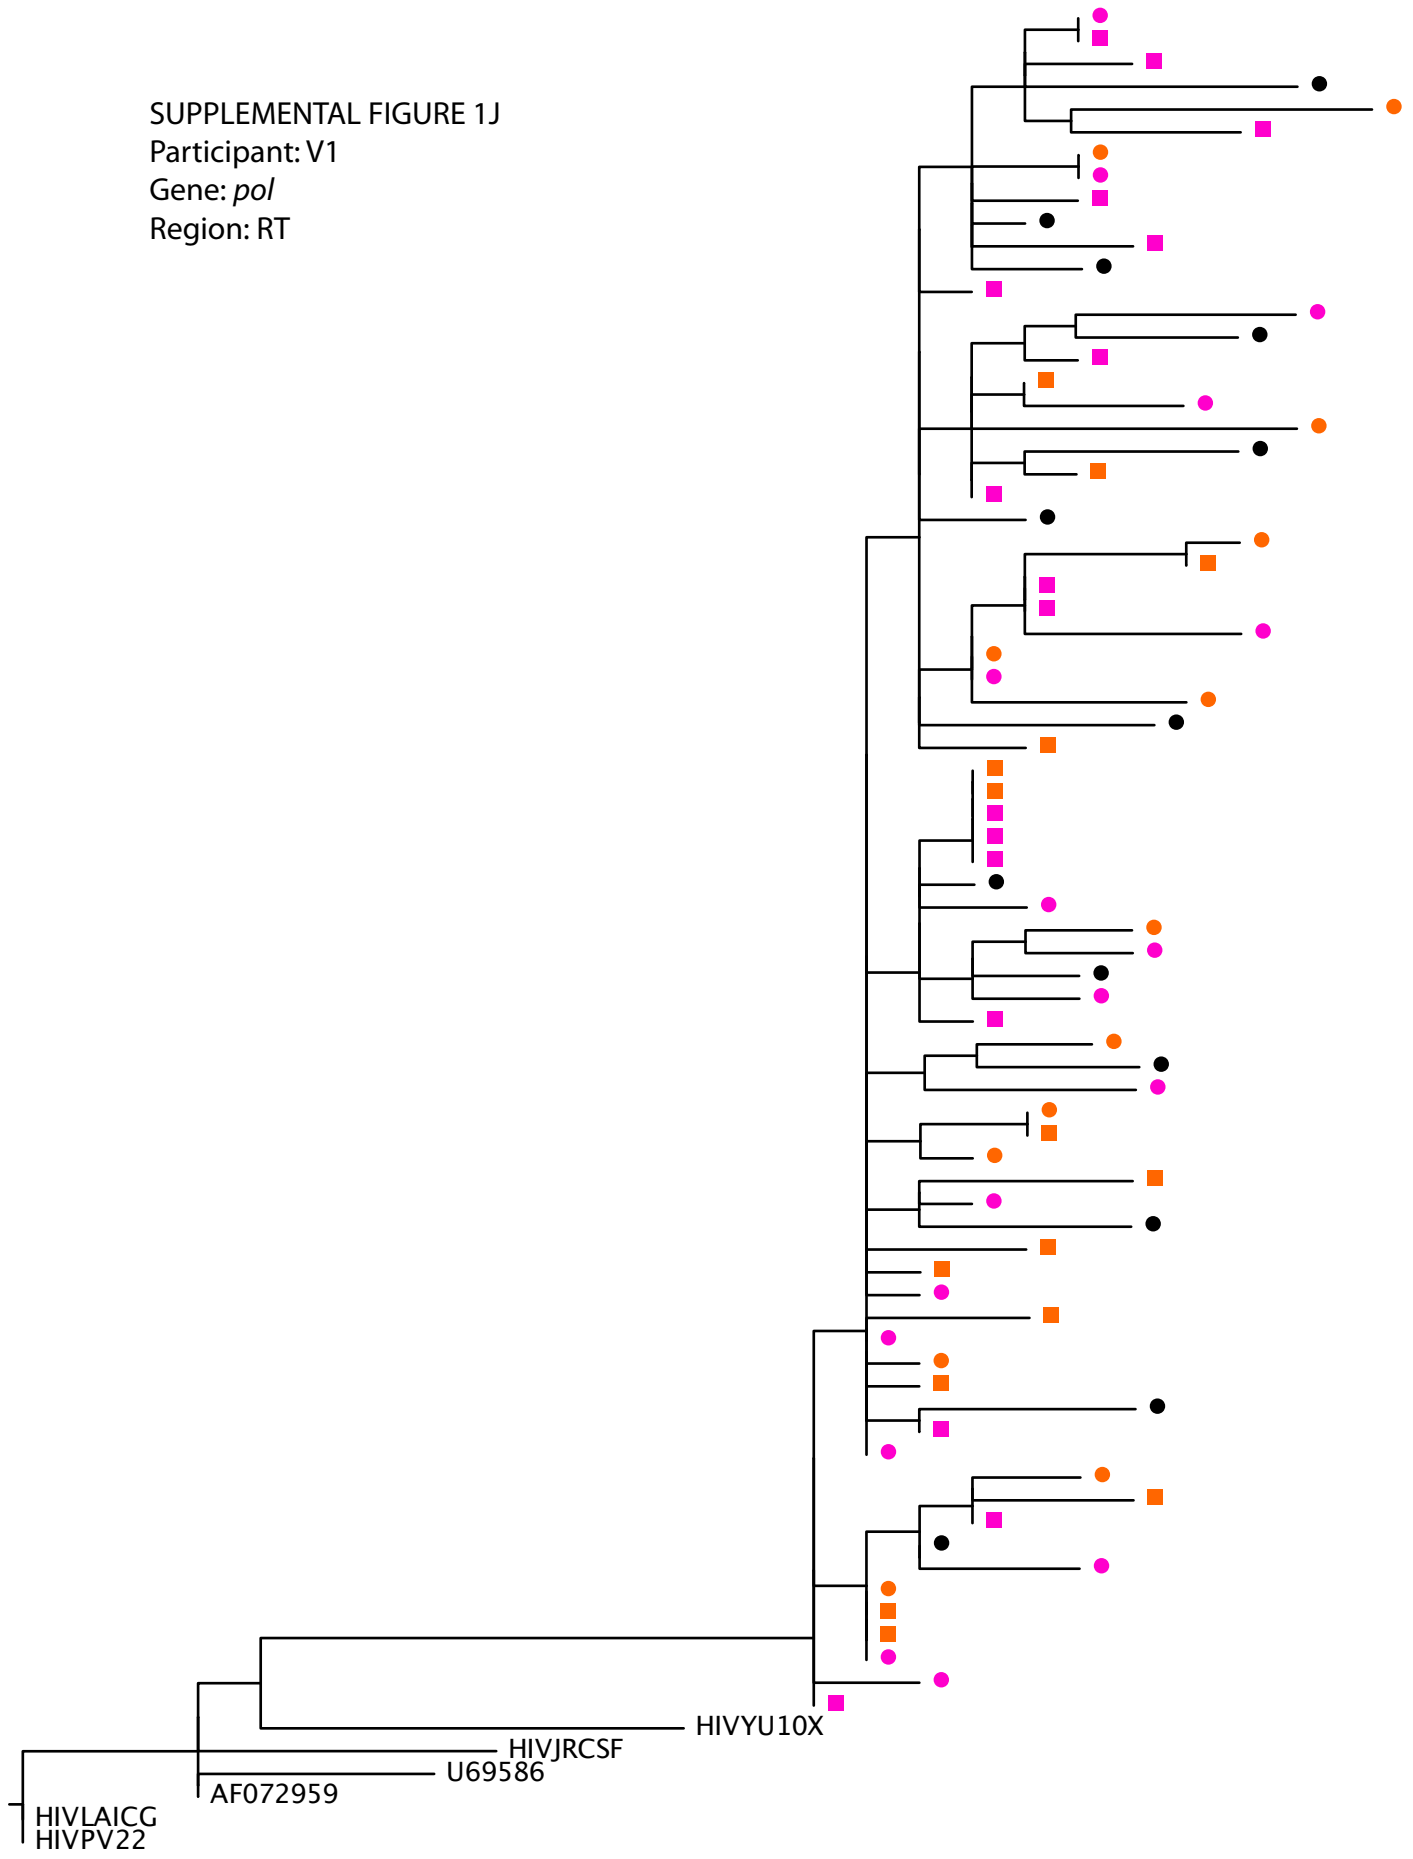

0.0050

## Supplemental Figure 2

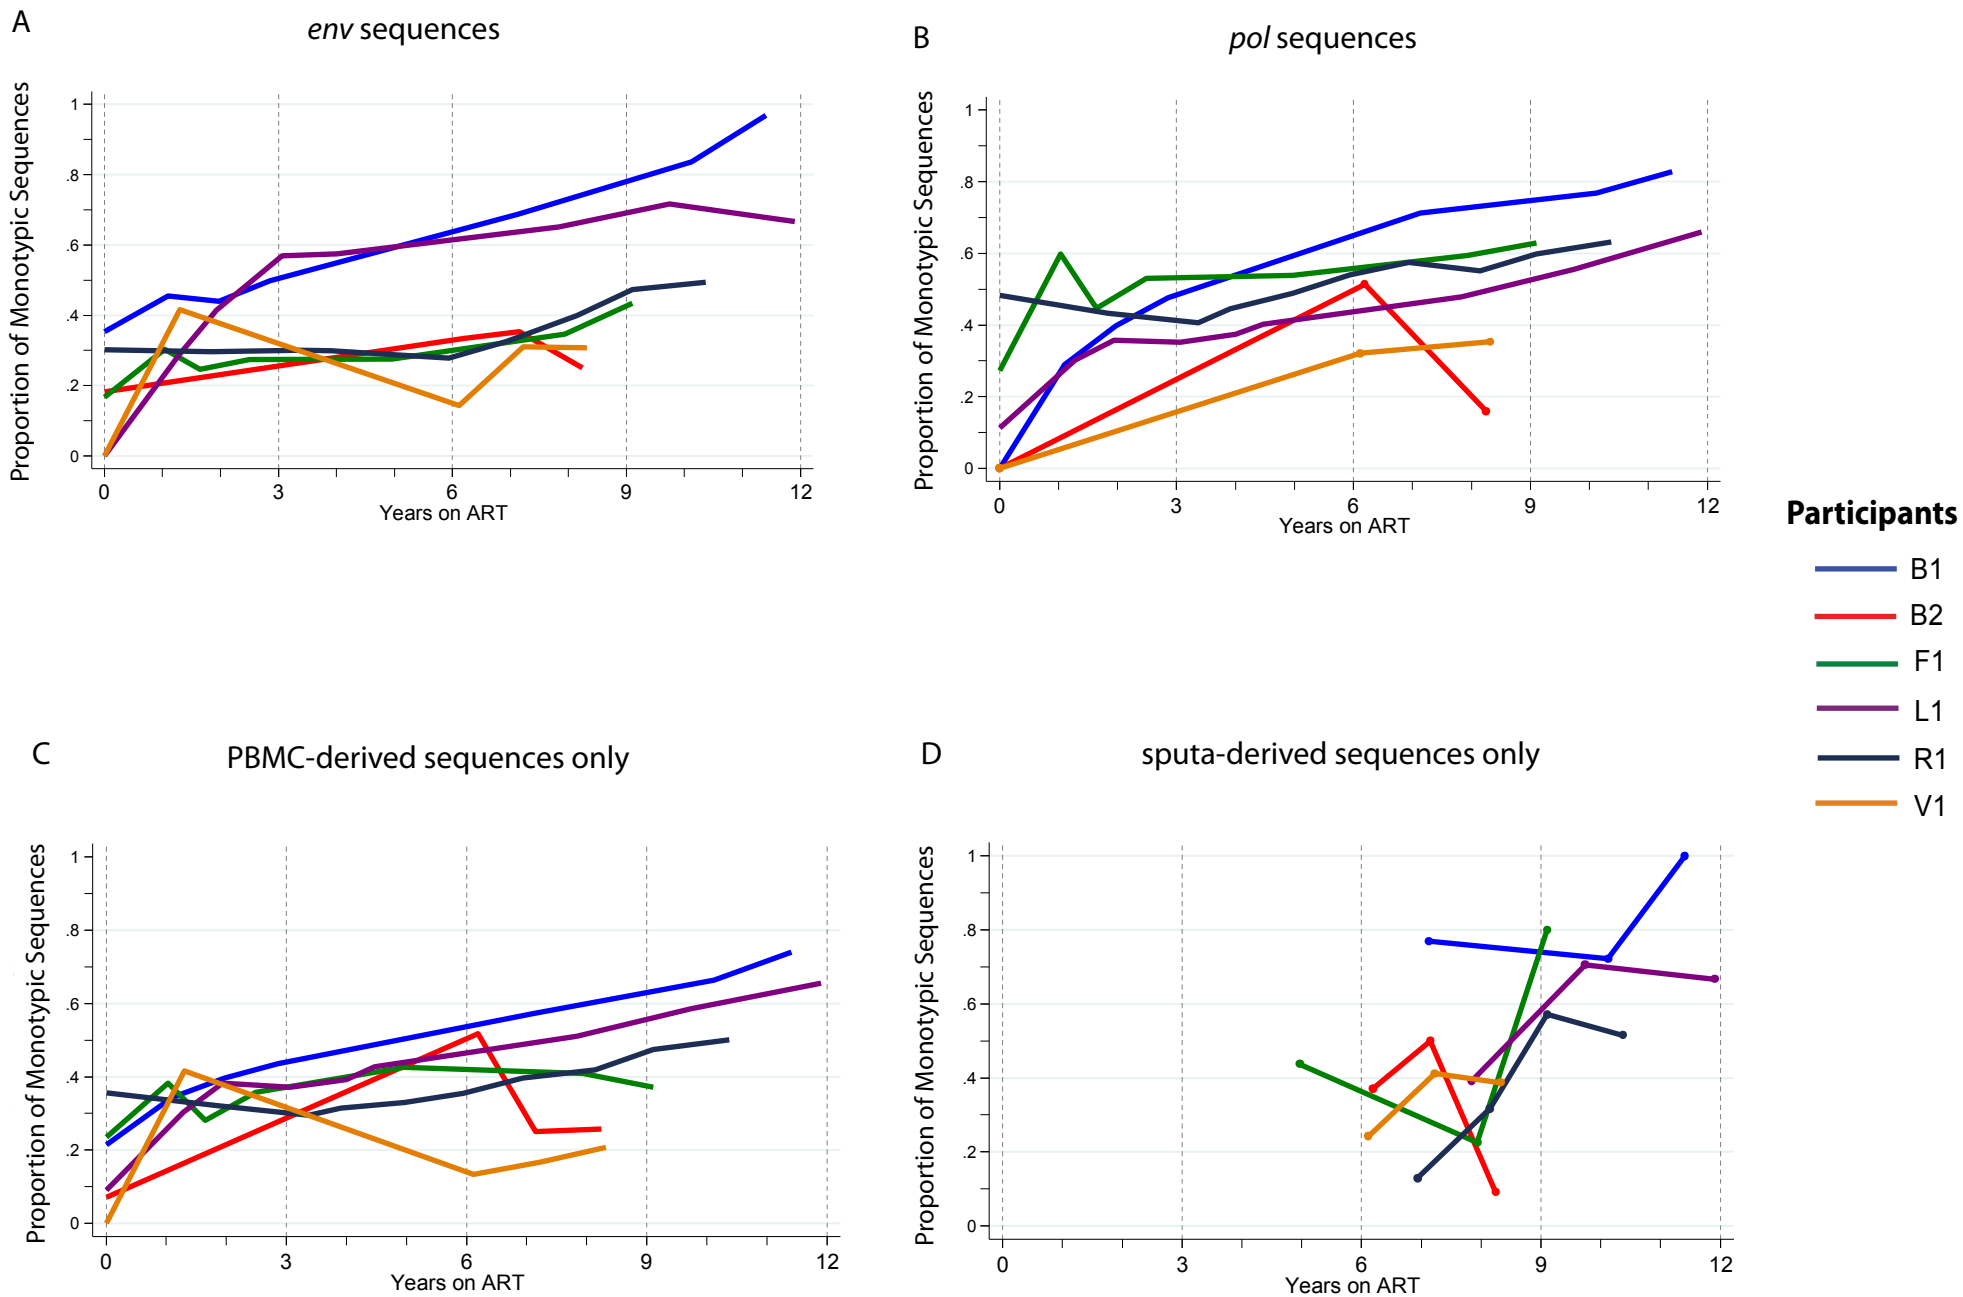

Supplement: JVI.01985-12_zjv999097221so1.pdf [file JVI.01985-12_zjv999097221so1.pdf]
